RESEARCH ARTICLE

# Distribution of siderophore gene systems on a *Vibrionaceae* phylogeny: Database searches, phylogenetic analyses and evolutionary perspectives

Sunniva Katharina Thode<sup>1</sup>, Ewelina Rojek<sup>2</sup>, Mikolaj Kozlowski<sup>2</sup>, Rafi Ahmad<sup>2\*</sup>, Peik Haugen<sup>1\*</sup>

**1** Department of Chemistry and Center for Bioinformatics (StB), Faculty of Science and Technology, UiT – The Arctic University of Norway, Tromsø, Norway, **2** Department of Natural Sciences and Technology, Faculty of Education and Natural Sciences, Inland Norway University of Applied Sciences, Hamar, Norway

\* [peik.haugen@uit.no](mailto:peik.haugen@uit.no) (PH); [rafi.ahmad@inn.no](mailto:rafi.ahmad@inn.no) (RA)

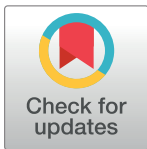

**OPEN ACCESS**

**Citation:** Thode SK, Rojek E, Kozlowski M, Ahmad R, Haugen P (2018) Distribution of siderophore gene systems on a *Vibrionaceae* phylogeny: Database searches, phylogenetic analyses and evolutionary perspectives. PLoS ONE 13(2): e0191860. <https://doi.org/10.1371/journal.pone.0191860>

**Editor:** Chih-Horng Kuo, Academia Sinica, TAIWAN

**Received:** May 22, 2017

**Accepted:** January 13, 2018

**Published:** February 14, 2018

**Copyright:** © 2018 Thode et al. This is an open access article distributed under the terms of the [Creative Commons Attribution License](https://creativecommons.org/licenses/by/4.0/), which permits unrestricted use, distribution, and reproduction in any medium, provided the original author and source are credited.

**Data Availability Statement:** All relevant data produced in this work are within the paper and its Supporting Information files.

**Funding:** This work was supported by: <https://eng.inn.no/> (RA); <https://en.uit.no/startside> (PH, SKT); and <http://site.uit.no/biostruct/> (PH, SKT).

**Competing interests:** The authors have declared that no competing interests exist.

**Abbreviations:** A. sp, *Aliivibrio* species; aa, Amino acid; ABC transporter, ATP-binding cassette

## Abstract

Siderophores are small molecules synthesized and secreted by bacteria and fungi to scavenge iron. Extracellular ferri-siderophores are recognized by cognate receptors on the cell surface for transport over membranes. Several siderophore systems from *Vibrionaceae* representatives are known and well understood, e.g., the molecular structure of the siderophore, the biosynthesis gene cluster and pathway, and the gene expression pattern. Less is known about how these systems are distributed among the ~140 *Vibrionaceae* species, and which evolutionary processes contributed to the present-day distribution. In this work, we compiled existing knowledge on siderophore biosynthesis systems and siderophore receptors from *Vibrionaceae* and used phylogenetic analyses to investigate their organization, distribution, origin and evolution. Through literature searches, we identified nine different siderophore biosynthesis systems and thirteen siderophore receptors in *Vibrionaceae*. Homologs were identified by BLAST searches, and the results were mapped onto a *Vibrionaceae* phylogeny. We identified 81 biosynthetic systems distributed in 45 *Vibrionaceae* species and 16 unclassified *Vibrionaceae* strains, and 409 receptors in 89 *Vibrionaceae* species and 49 unclassified *Vibrionaceae* strains. The majority of taxa are associated with at least one type of siderophore biosynthesis system, some (e.g., aerobactin and vibrioferrin) of which are widely distributed in the family, whereas others (i.e., bisucaberin and vibriobactin) are found in one lineage. Cognate receptors are found more widespread. Phylogenetic analysis of three siderophore systems (piscibactin, vibrioferrin and aerobactin) show that their present-day distribution can be explained by an old insertion into *Vibrionaceae*, followed mainly by stable vertical evolution and extensive loss, and some cases of horizontal gene transfers. The present work provides an up to date overview of the distribution of siderophore-based iron acquisition systems in *Vibrionaceae*, and presents phylogenetic analysis of these systems. Our results suggest that the present-day distribution is a result of several evolutionary processes, such as old and new gene acquisitions, gene loss, and both vertical and horizontal gene transfers.

transporter; BLASTp, Protein BLAST; G. sp, *Grimontia* species; ML, Maximum Likelihood; MLSA, Multilocus sequence alignment; NRPS, Non-Ribosomal Peptide Synthase; nt, nucleotide; P. sp, *Photobacterium* species; V. sp, *Vibrio* species.

## Introduction

Siderophores represent a group of relatively small, and low molecular weight secondary metabolites with high-affinity binding potential to ferric iron [1]. They are produced and secreted by a broad range of microorganisms (e.g., bacteria and fungi), and some plants. Under low iron conditions, such as in aquatic environments or inside a vertebrate host, e.g., bacteria must use highly specific strategies to acquire iron and other essential micronutrients [2,3]. To overcome iron starvation, siderophores are synthesized and secreted to their surroundings where they chelate ferric iron. Once bound, the ferric iron-siderophore complexes are recognized by siderophore receptors, and transported over the membrane by ABC transporters using TonB complexes as energy transducers.

Interestingly, bacteria produce siderophores of several major classes, each of which can have a diverse set of molecular structures, presumably because production of unique siderophores can provide individual bacteria with an advantage in the competition with others [4]. For example, polymicrobial studies have shown that siderophores from one species can inhibit growth or functions of other species, e.g. low concentrations of avaroferrin from *Shewanella algae* inhibit swarming of *Vibrio alginolyticus* and a siderophore from *Pseudomonas fluorescens* inhibits growth of *Vibrio anguillarum* [5,6]. Such kin discrimination strategy can however be bypassed by “cheaters”, i.e., bacteria expressing receptors on their surface with affinity to siderophores produced by others [7]. This mechanism is also known as exogenous or xeno-siderophore utilization. So surely, there must be a constant battle between microorganisms for available iron, and they can produce (i) own siderophores and the respective receptors, and/or (ii) “cheating” receptors for utilization of siderophores produced by others.

We have in this work, studied siderophore biosynthesis systems and their respective receptors from the *Vibrionaceae* family. *Vibrionaceae* represents a large and diverse group of Gram-negative Gammaproteobacteria, and the evolutionary relationships between many of the approximately 140 different species were recently updated by Sawabe and coworkers [8]. Representatives of this family have been heavily studied, typically due to their ability to cause serious diseases in humans or animals.

The causative agent of the human disease cholera, *Vibrio cholerae*, is the most famous *Vibrionaceae* representative. *V. cholerae* produces the catechol siderophore vibriobactin using proteins encoded by *vibABCDEFH* [9,10]. Ferric iron-vibriobactin complexes are recognized by the receptor ViuA [11]. Moreover, *V. cholerae* can “cheat” on derivatives of enterobactin (produced by e.g., *Escherichia coli*) using the receptors IrgA and VctA [12], fluvibactin (synthesized by *Vibrio fluvialis*) using the ViuA, VctA and IrgA receptors, and finally ferrichrome by using the FhuA receptor [12–14]. *Vibrio vulnificus* represents another significant human pathogen [15]. This bacterium produces the catechol siderophores vulnibactin by using proteins encoded by the gene cluster VV2\_0830—VV2\_0844 [16], and recognizes ferri-vulnibactin via the VuuA receptor [17]. It has also been proposed that *V. vulnificus* produces an uncharacterized hydroxamate siderophore, and an uncharacterized catechol siderophore using, in part, same genes as for vulnibactin [16,18]. Finally, *V. vulnificus* can transport and utilize aerobactin (IutA receptor) [19], deferoxamine B (DesA receptor) [20,21] and vibriobactin [22]. The human pathogen *Vibrio parahaemolyticus* [23] produces the carboxylate siderophore named vibrioferrin (encoded by *pvsABDE*) [24]. Vibrioferrin is sensitive to photolysis and has a lower affinity for iron compared to other catechol-type siderophores in vibrios. Ferri-vibrioferrin is recognized and transported over the membranes using the receptor PvuA [25]. *V. parahaemolyticus* can “cheat” using the exogenous siderophores enterobactin, aerobactin, ferrichrome and possibly vibriobactin and

fluvibactin [22,26–29]. *V. alginolyticus* is an emerging foodborne pathogen that causes gastroenteritis and peritonitis in humans [30]. The B522 strain contains the vibrioferrin biosynthesis cluster [5,31], and can also utilize siderophores synthesized by *V. cholerae*, *V. fluvialis* and *V. parahaemolyticus* and ferrichrome [32,33].

Several *Vibrionaceae* fish pathogens have been studied with respect to siderophore production and utilization, e.g., *V. anguillarum*, a pathogen causing haemorrhagic septicemia in fish, bivalves and crustaceans [34], *Aliivibrio salmonicida*, causing cold-water vibriosis in Atlantic salmon at low seawater temperatures [35,36], *Photobacterium damsela* subsp. *piscicida* [37,38], and *V. alginolyticus* [30]. Depending on strain, *V. anguillarum* can synthesize and utilize the mixed catechol/hydroxamate siderophore anguibactin (only serotype O1 strain; biosynthesis encoded by *angABCE<sup>B</sup>/G MTHRNUD* and recognized by FatA receptor) [39,40], or vanchrobactin (found in all serotype O2 strains, some plasmid less O1 strains, and several other serotypes). Biosynthesis of the latter is encoded by *dapH* and *vabABCEFH* [41], and recognized by a receptor encoded by *fvta* [42]). Anguibactin biosynthesis genes are located both on a conjugative plasmid named pJM1, and on chromosomes (*angABC* and *angE*) [40]. Intriguingly, for *V. anguillarum* strain 775 the presence of pJM1 and anguibactin coincides with the lack of vanchrobactin [43]. Its chromosome contains entire vanchrobactin gene cluster, except that *vabF* is interrupted by an RS1 transposon originating from pJM1. Closely related strains that lack this plasmid produce vanchrobactin. The authors therefore hypothesize that vanchrobactin was produced by the bacterium prior to the acquisition of pJM1 (and thus the anguibactin cluster), and that production of vanchrobactin at some point was suppressed by inactivation of *vabF* since anguibactin has a higher affinity for iron. Moreover, *V. anguillarum* utilizes exogenous siderophores like enterobactin, ferrichrome and citrate [44,45]. *A. salmonicida* synthesizes and utilizes the di-hydroxamate siderophore bisucaberin (biosynthesis encoded by *bibABC* and recognized by the BitA receptor) [46,47]. It has been postulated that the siderophore production is vital for the virulence of *A. salmonicida*. This assumption is based on that production of significant amounts of bisucaberin is restricted to low temperature conditions (i.e., the bacterium only causes disease at low temperatures) [46]. Also, we recently showed that the genes responsible for bisucaberin production are highly up-regulated under low iron conditions and that the production is strongly regulated by Fur [48]. A system for aerobactin synthesis is in contrast not expressed, probably because the cluster is non-functional due to frameshift mutations and loss of the promoter [49]. The genome of *A. salmonicida* also encodes the deferroxamine B receptor DesA and the aerobactin receptor IutA [49]. The fish pathogen *P. damsela* subsp. *piscicida* produces the mixed carboxylate/hydroxamate siderophore piscibactin (encoded by *dapH* and *irp123459*), which is probably transported by FrpA [37,38,50]. The shrimp pathogen *Vibrio campbellii* produces the catechol siderophore amphi-enterobactin (biosynthesis encoded by *aebABCEG*), however the receptor has not been identified [51]. In addition, *Vibrionaceae* representatives may produce other siderophores such as amphibactins, deferroaxamines, tri-vanchrobactins, ochrobactins and probably several more. However, although the biosynthetic gene clusters responsible for production of these molecules are well known from other bacteria, they may not have been conclusively identified in *Vibrionaceae*. In *Vibrio campbellii* DS40M4, the same gene cluster is responsible for production of both vanchrobactin and tri-vanchrobactin, but the main determinant that regulates which of them is produced remains unknown [52]. Payne and co-workers recently reviewed siderophore biosynthesis and utilization in *Vibrionaceae*, with a focus on vibrios [7]. This inspired us to use the existing knowledge to investigate the distribution and evolution of the different siderophore systems further. In this work, we first performed literature searches on *Vibrionaceae* siderophore gene systems, then we used this knowledge to search the databases for siderophore systems

**Table 1. RefSeq accession numbers of known *Vibrionaceae* siderophore biosynthetic proteins.**

| Siderophore        | Organism                            | Siderophore biosynthesis protein accession numbers                                                                                                                                                                                                              | Ref    |
|--------------------|-------------------------------------|-----------------------------------------------------------------------------------------------------------------------------------------------------------------------------------------------------------------------------------------------------------------|--------|
| Aerobactin         | <i>V. mimicus</i>                   | IucA(WP_000554936.1) IucB(WP_000033134.1) IucC(WP_000372426.1) IucD(WP_000401386.1)                                                                                                                                                                             | [53]   |
| Bisucaberin        | <i>A. salmonicida</i>               | BibA(WP_012549025.1) BibB(WP_012549026.1) BibC(WP_012549027.1)                                                                                                                                                                                                  | [47]   |
| Vibrioferin        | <i>V. parahaemolyticus</i>          | PvsA(WP_015313675.1) PvsB(WP_015313676.1) PvsC(WP_015313677.1) PvsD(WP_015313678.1) PvsE (WP_015313679.1)                                                                                                                                                       | [24]   |
| Vibriobactin       | <i>V. cholerae</i>                  | VibA (WP_000654285.1) VibB (WP_000997093.1) VibC(WP_000245175.1) VibD(WP_000874996.1) VibE (WP_000205544.1) VibF (WP_000523394.1) VibH(WP_001880577.1)                                                                                                          | [9,10] |
| Vanchrobactin      | <i>Vibrio anguillarum</i>           | DapH(WP_011154675.1) VabA(WP_064624836.1) VabB(WP_064624831.1) VabC(WP_043004165.1) VabE (WP_019281788.1) VabF (WP_019281791.1) VabH (WP_019281793.1)                                                                                                           | [41]   |
| Piscibactin        | <i>P. damselae subsp. piscicida</i> | DapH (AKQ52526.1) Irp1(AKQ52532.1) Irp2(AKQ52531.1) Irp3(AKQ52533.1) Irp4(AKQ52534.1) Irp5 (AKQ52536.1)                                                                                                                                                         | [37]   |
| Anguibactin        | <i>V. anguillarum</i>               | AngA(WP_013857267.1) AngB(WP_013857270.1) AngC(WP_043004165.1) AngE(WP_013857269.1) AngB/G (WP_011154672.1) AngM(WP_011154633.1) AngT(WP_011154640.1) AngH(WP_011154645.1) AngR (WP_011154639.1) AngN(WP_011154642.1) AngU(WP_011154641.1) AngD(WP_011154670.1) | [40]   |
| Vulnibactin        | <i>V. vulnificus</i>                | VV2_0830(WP_011081748.1) VV2_0831(AAO07755.1) VV2_0834(WP_011081751.1) VV2_0835 (WP_011081752.1) VV2_0836(WP_011081753.1) VV2_0838/VenB(WP_011081755.1) VV2_0839 (WP_011081756.1) VV2_0840(WP_011081757.1) VV2_0844(AAO07767.2)                                 | [16]   |
| Amphi-enterobactin | <i>V. campbellii</i>                | AebG (WP_012127281.1) AebA(WP_041853223.1) AebC(WP_012127292.1) AebE(WP_012127293.1) AebB (WP_012127294.1) AebF(WP_041853220.1)                                                                                                                                 | [51]   |

<https://doi.org/10.1371/journal.pone.0191860.t001>

in all available *Vibrionaceae* genomes, and mapped the result onto a *Vibrionaceae* phylogenetic network. The evolution of individual siderophore biosynthesis systems and receptors was next studied by constructing phylogenetic trees based on amino acids datasets, and by comparing the resulting tree topologies to host trees. Through the presented work, we wish to broaden the perspective and existing knowledge on siderophore synthesis and utilization within the *Vibrionaceae* family.

## Materials and methods

### Data retrieval

Siderophore biosynthesis gene clusters and associated siderophore receptor genes in *Vibrionaceae* were identified by literature searches, and the corresponding protein sequences were retrieved from NCBI's protein sequence databank. The literature search was done over several months during fall 2016. Updated RefSeq accession numbers for identified proteins with the 'WP' prefix (the 'WP' accession prefix was introduced to decrease redundancy in RefSeq, and has replaced the 'YP', 'NP' and 'ZP' prefixes) are presented in Tables 1 and 2. These sequences were next used as queries in BLASTp searches to find homologous protein sequences. BLASTp was run using the non-redundant protein database while restricting the search to the *Vibrionaceae* family (NCBI taxid: 641). The following criteria were used to decide if a siderophore biosynthesis gene cluster is present in any given species: (i) threshold values from BLASTp were set to  $\geq 80\%$  coverage and  $\geq 50\%$  identity, (ii) all proteins associated with a siderophore gene cluster must be present in the same species, (iii) pseudogenes were rejected, and (iv) BLASTp hits labelled "low quality protein" in the databases were excluded. Within-species variations were not considered because it would require extensive manual curation of a huge number of blast hits and database entries, which was not feasible to do as part of this study. Also, some of the siderophore pathways may share parts of the biosynthesis steps e.g., in the proposed pathways of anguibactin, vanchrobactin, vibriobactin and enterobactin synthesis, all involve synthesis of DHBA, later the four pathways split into unique steps. Siderophore synthesis pathways may therefore use common enzymes, or they

**Table 2. RefSeq accession numbers of known *Vibrionaceae* siderophore receptor proteins.**

| Organism                                  | Receptor              | Transport                    | Ref  |
|-------------------------------------------|-----------------------|------------------------------|------|
| <i>V. mimicus</i>                         | IutA (WP_000843157.1) | Aerobactin                   | [53] |
| <i>A. salmonicida</i>                     | BitA (WP_012549028.1) | Bisucaberin                  | [47] |
| <i>V. parahaemolyticus</i>                | PvuA (WP_057620147.1) | Vibrioferrin                 | [25] |
| <i>V. parahaemolyticus</i>                | PeuA (WP_005479624.1) | Enterobactin                 | [27] |
| <i>V. cholerae</i>                        | ViuA (WP_000279435.1) | Vibriobactin<br>Fluvisbactin | [11] |
| <i>V. anguillarum</i>                     | FvtA (WP_019281795.1) | Vanchrobactin                | [42] |
| <i>V. anguillarum</i>                     | FatA (WP_011154638.1) | Anguibactin                  | [54] |
| <i>V. cholerae</i>                        | VctA (WP_000350325.1) | Enterobactin<br>Fluvisbactin | [13] |
| <i>V. cholerae</i>                        | IrgA (WP_000086048.1) | Enterobactin<br>Fluvisbactin | [13] |
| <i>V. vulnificus</i>                      | VvuA (WP_015728225.1) | Vulnibactin                  | [17] |
| <i>V. cholerae</i>                        | FhuA (WP_053043596.1) | Ferrichrome                  | [14] |
| <i>V. furnissii</i>                       | DesA (WP_004725209.1) | Deferoxamine B               | [55] |
| <i>P. damsela</i> subsp. <i>Piscicida</i> | FrpA (AKQ52529.1)     | Piscibactin                  | [37] |

<https://doi.org/10.1371/journal.pone.0191860.t002>

may encode redundant enzymes. Such overlapping and redundancies of pathways were not specifically considered in this work.

### Mapping of siderophore systems onto a *Vibrionaceae* phylogenetic network

A *Vibrionaceae* host phylogeny was inferred based on sequence alignments of the genes *ftsZ*, *gap*, *gyrB*, *mreB*, *pyrH*, *recA*, *rpoA* and *topA*, provided by Dr. Sawabe [8]. SplitsTree4 [56] was used to concatenate the sequences to construct a multi locus sequence alignment (MLSA), and to generate an unrooted phylogenetic network. Settings were set to ‘NeighbourNet’ method with ‘uncorrected P’ distance. Presence/absence of siderophore biosynthesis and receptor genes were mapped onto the phylogenetic network. Only complete siderophore biosynthesis clusters are shown. The siderophore receptors were considered separately, and mapped onto the same network. Species with positive hits, but not included in the MLSA dataset, were placed onto the network based on the literature. “Unclassified” *Vibrionaceae* strains are not shown on the network, but can be found in S1 and S2 Tables.

### Phylogenetic analysis of siderophore biosynthesis systems and receptors

Amino acid sequences of proteins involved in siderophore biosynthesis were aligned using ClustalW [57]. Proteins belonging to same clusters were concatenated using SplitsTree4 [56] and exported to Fasta format, thus generating the final datasets. Next, Mega6 [58] was used to generate Maximum Likelihood (ML) trees based on the individual siderophore biosynthesis datasets. The robustness of nodes in the resulting phylogenies was tested by running Bootstrap analyses, using the ML method (2000 replicates, JTT substitution model, uniform rates, and ‘Complete deletion’ in gap handling).

To address inheritance of the siderophore biosynthesis systems, we next constructed host phylogenies of same taxa as those containing the siderophore systems. Host trees were based on concatenated datasets of the same eight genes as described above. ML-trees were constructed using the Tamura-Nei model [59], and all gaps and missing data were removed. Phylogenies of the vibrioferrin (PvsABCDE), piscibactin (Irp123459), and aerobactin (IucABCD) biosynthesis systems, and their corresponding MLSA host trees, were rooted on *Aliivibrio*

*wodanis*, *Photobacterium profundum*, and *Grimontia hollisae*, respectively. The phylogeny of siderophore receptors was constructed essentially as described above. Briefly, amino acid sequences of homologous receptor sequences were aligned using ClustalW, and Mega6 [58] was then used to make ML-trees. Bootstrap analysis was done using the ML method, 2000 pseudoreplicates, the JTT model, uniform rates, and complete deletion of gaps. Corresponding MLSA trees were constructed as described for the cluster. The receptor phylogenies were compared to host trees, which were constructed as described above.

## Results and discussion

### Compilation of siderophore biosynthesis gene cluster sequences from *Vibrionaceae*

In this work, we set out to search both in the literature and the global sequence databases, to identify gene clusters for biosynthesis of siderophores in *Vibrionaceae*, and compile and visualize the result in a simple and comprehensible manner. See [Materials and methods](#) for details on search criteria. [Fig 1](#) and [Table 1](#) summarize our findings. Based on the literature we identified nine siderophore biosynthesis gene clusters responsible for producing aerobactin, bisucaberin, vibrioferrin, vibriobactin, vanchrobactin, piscibactin, anguibactin, amphienterobactin and vulnibactin. [Fig 1](#) shows that genes belonging to the individual siderophore biosynthetic pathways are typically found clustered “bumper-to-bumper” on the chromosome, or as in *V. anguillarum*, on a plasmid. Pathways for hydroxamate or carboxylate type siderophores are encoded by 3–5 genes, all encoded on the same DNA strand, whereas catechol or mixed siderophores pathways are typically encoded by 6–11 genes, including one or more non-ribosomal peptide synthase (NRPS) gene(s), located on both strands and not necessarily in immediate proximity to each other. The synteny and general organization of the latter siderophore biosynthetic gene cluster types therefore appear more complex. Other siderophores are known to be produced by *Vibrionaceae* representatives. However, even though their structures are known, their biosynthesis gene clusters have not been conclusively identified in *Vibrionaceae*, and they have therefore been omitted from [Fig 1](#). Examples are shown in [S1 Fig](#), e.g., *V. fluvialis* and *Vibrio nigripulchritudo* produce the catechol siderophores fluvibactin and nigribactin, respectively [60,61]. Also, *Vibrio* isolates are known to produce trivanchrobactin (*V. campbellii* DS40M4; [62]), ochrobactins (*V. sp.* DS40M5; [63]) and desferroxamines (*V. sp.* BLI-41; [64]). In *V. campbellii* DS40M4 vanchrobactin and trivanchrobactin are produced from the same biosynthesis gene cluster, but in the distinguishing determinant is unknown[52].

Next, we used the known *Vibrionaceae* amino acids sequences (see [Fig 1A and 1B](#)) as queries in BLASTp searches to identify homologous siderophore gene clusters in all available *Vibrionaceae* genomes in the non-redundant protein sequences database. Threshold values were set to  $\geq 80\%$  coverage and  $\geq 50\%$  identity. Only complete siderophore biosynthesis clusters were kept (i.e., all genes needed for biosynthesis must be present). Our search identified 81 biosynthetic clusters in total, distributed among 45 species and 4 genera, and 16 unclassified *Vibrionaceae* strains (i.e., *Vibrio* sp.) (see [S1 Table](#) for details). The majority of species can potentially produce 1–3 of known *Vibrionaceae* siderophores, with zero being the minimum and four the maximum.

Bacteria must encode and express siderophore receptors on their surface in order to take up and utilize siderophore-Fe<sup>3+</sup> complexes. It is therefore of equal importance to identify and map the existence of siderophore-associated receptors. In a similar approach as described above, we identified and used siderophore receptor sequences in BLASTp searches. ([Table 2](#)). The receptor searches identified 410 siderophore receptors in 89 classified *Vibrionaceae* species

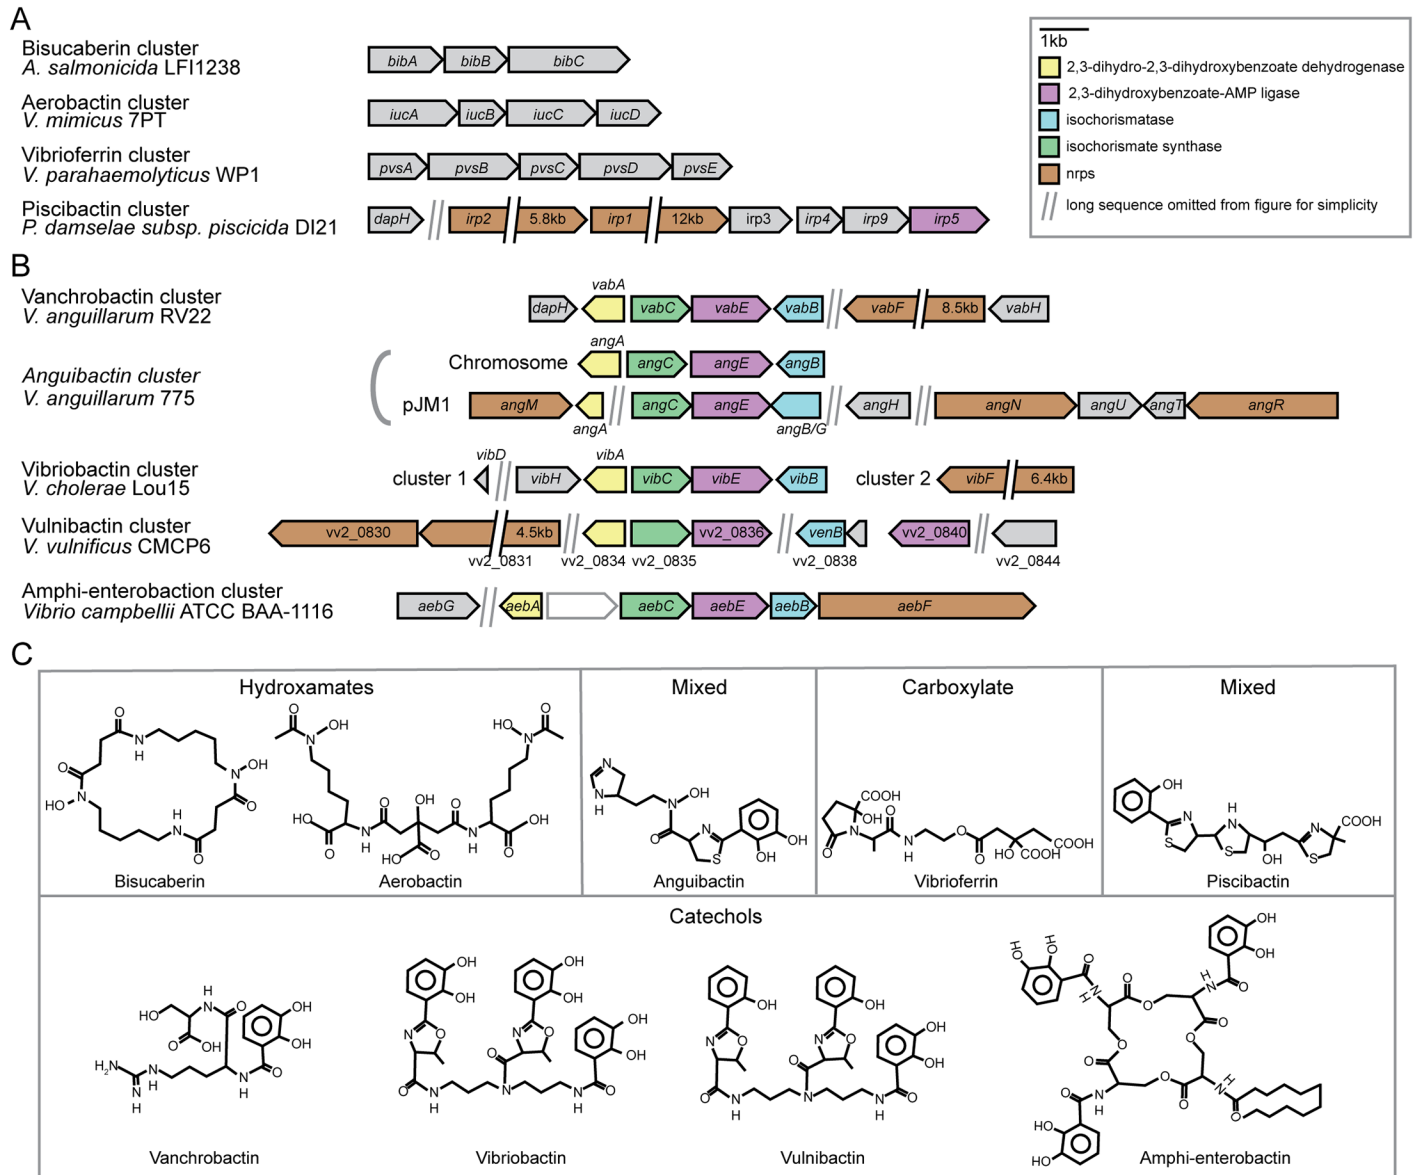

**Fig 1. Organization of *Vibrionaceae* siderophore biosynthesis clusters and schematic structure of the corresponding siderophores.** (A) *Vibrionaceae* hydroxamate and carboxylate and siderophore biosynthesis clusters. (B) *Vibrionaceae* catechol and mixed catechol/hydroxamate siderophore biosynthesis cluster. (C) Schematic 2D structure representation of *Vibrionaceae* siderophores with known biosynthesis gene clusters.

<https://doi.org/10.1371/journal.pone.0191860.g001>

(and 49 unclassified *Vibrionaceae* strains), representing 5 genera (when using the same cut-off values as described above). The complete list of identified siderophore receptors is presented in S2 Table. We found homologs of known *Vibrionaceae* siderophore receptors in almost all *Vibrionaceae* species. Twenty-nine of the representatives in the split network do not encode homologs of known *Vibrionaceae* siderophore biosynthesis clusters or receptor. Of the 29, only 14 are fully sequenced, and the maximum number of different siderophore receptors found in a single genome was eight (i.e., in *V. alginolyticus*).

In summary, we searched the literature for known siderophore gene clusters from the *Vibrionaceae* family and identified nine types. The corresponding amino acids sequences were

next used as queries in BLASTp to identify homologs. A total of 81 biosynthetic clusters distributed among 45 species and 16 unclassified *Vibrionaceae* strains were identified. Using a similar approach, we identified 409 siderophore receptor genes in 89 *Vibrionaceae* species and 49 unclassified *Vibrionaceae* strains.

### Distribution of siderophore biosynthesis clusters and siderophore receptors in the *Vibrionaceae* family

Fig 2 shows the distribution of siderophore biosynthetic systems and receptor genes on a phylogenetic network containing 86 representative species and unclassified strains from *Vibrionaceae*.

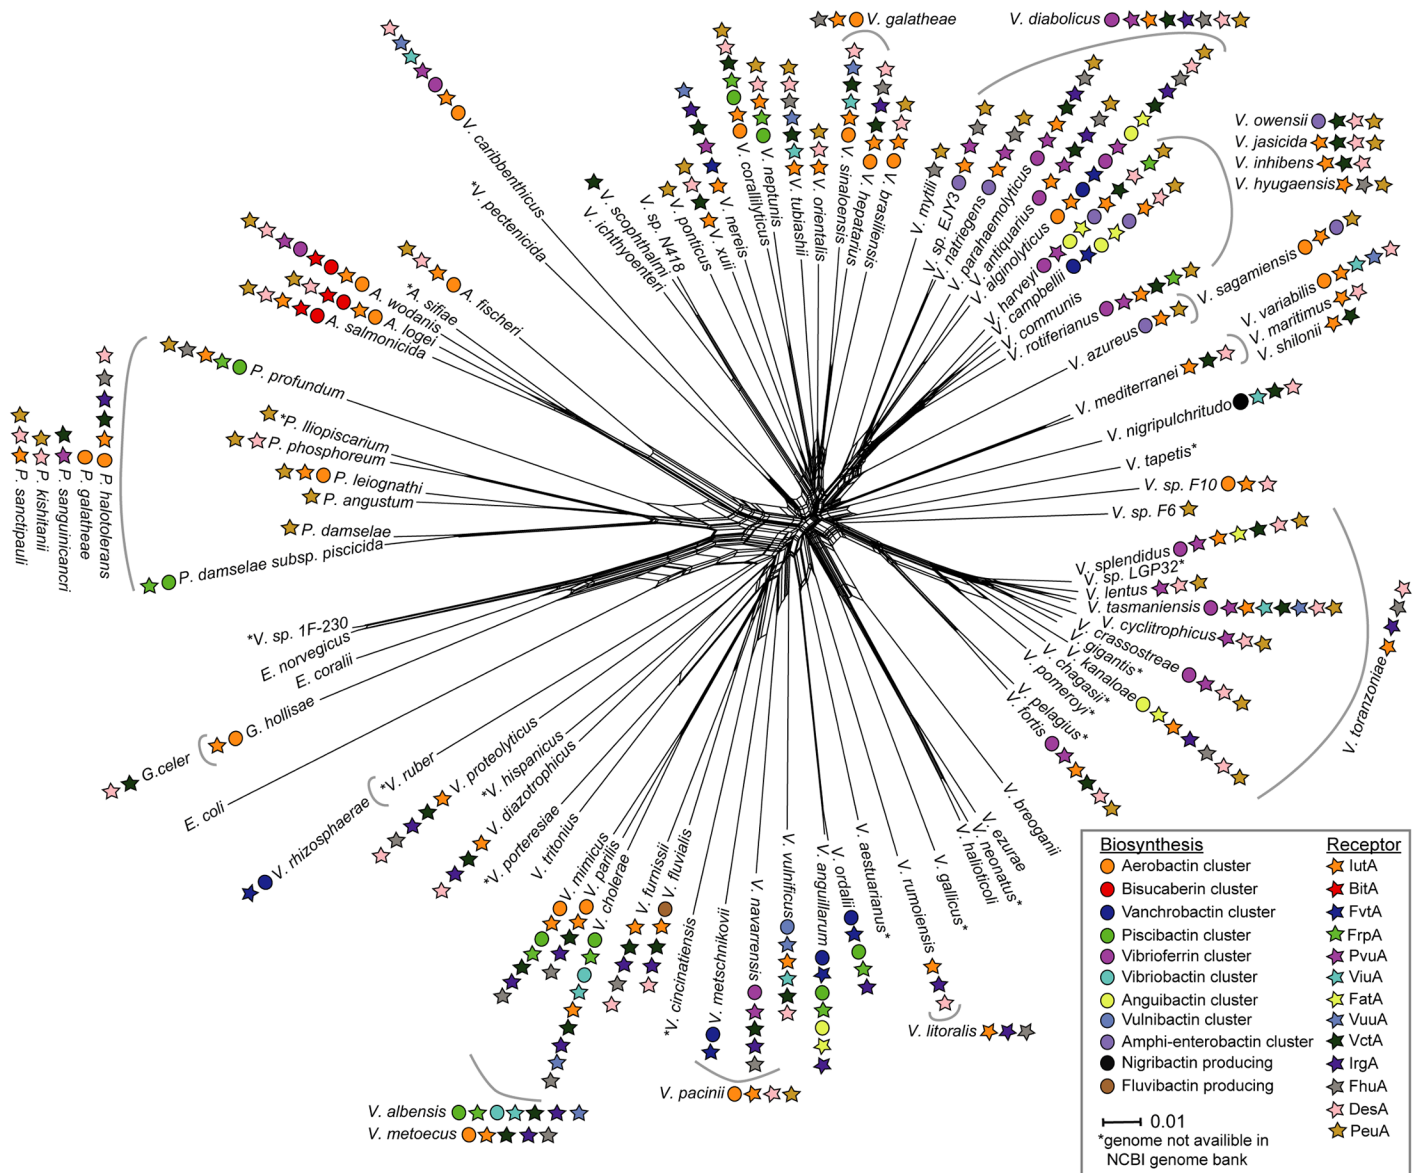

**Fig 2. Distribution of homologs of known *Vibrionaceae* siderophore biosynthesis clusters and receptors mapped to a phylogeny.** The phylogenetic split network is based on a dataset from Sawabe and co-workers [8], and consists of the genes *ftsZ*, *gap*, *gyrB*, *mreB*, *pyrH*, *recA*, *rpoA* and *topA*. The tree was constructed using SplitsTree4 to concatenate the individual gene alignments, and settings for network were uncorrected P and NeighborNet [56]. Branch lengths are to scale and species located outside grey arches were not included in the MLSA files and have been placed according to literature [71–86].

<https://doi.org/10.1371/journal.pone.0191860.g002>



Overall, the figure shows that the vast majority of species are associated with at least one type of siderophore system. We have, however not examined to what extent each of the siderophore systems are present in each species. In other words, individual isolates may or may not contain siderophore systems associated with that species, as indicated on the splits network. Moreover, some siderophore systems are restricted to a very narrow phylogenetic lineage, whereas others have a wide but sporadic presence. For example, the aerobactin, vanchrobactin and piscibactin biosynthesis clusters are scattered across multiple phylogenetic lineages, and anguibactin are found in *V. anguillarum* as well as in the *Splendius* and *Harveyi* clades. Similarly, vibrioferrin is found in *A. wodanis* and *Vibrio navarrensis*, and inside the *Harveyi* and *Splendidus* clades. A scattered distribution can potentially be explained (at least in part) by spread of siderophore clusters via plasmids. For example, serotype O1 strains of *V. anguillarum* 775 carries both chromosomal (Chr I) and plasmid-born (pJM1) genes for anguibactin biosynthesis, most of them on the plasmid (i.e., angB, angD, angCE, angN, angR, angM, angH, angT, angU) [40,65,66]. The plasmid-carried genes have been hypothesized to spread e.g., into *Vibrio harveyi*, or vice versa (see [67]). Similarly, a piscibactin biosynthesis cluster is located on a conjugative plasmid (pPHDP70) of a highly virulent *P. damsela* subsp. *piscicida* DI21 [50]. In experiments, Osario et al. showed that pPHDP70 can be conjugally transferred into multiple Gammaproteobacteria, including *E. coli*, *Aeromonas salmonicida*, and *V. anguillarum*. Moreover, the authors showed that a *V. alginolyticus* strain acquired the ability to both synthesize and utilize piscibactin after receiving pPHDP70 by conjugation.

To clarify if other *Vibrionaceae* representatives carry siderophore-encoding plasmids, we compiled all available plasmid sequences from the EBI Genomes Plasmid database (<https://www.ebi.ac.uk/genomes/plasmid.html>). These sequences were (i) submitted to antiSMASH ver. 4.0.2, and (ii) used as BLAST database in a tBLASTn search against all sequences from Table 1 as queries. The pPHDP70 plasmid sequence (described above) was missing from the EBI database and was manually added to the BLAST database file. Both methods identified the two plasmid-encoded systems in *V. anguillarum* and *P. damsela* subsp. *piscicida* as described above, but failed to find previously unrecognized plasmid-encoded siderophore gene clusters in *Vibrionaceae*.

To summarize, based on the current wide, but sporadic distribution of e.g., anguibactin and piscibactin, in addition to several lines of experimental evidence, it is likely that plasmids have contributed to transfers of siderophore gene clusters into new species, and thus likely contributed to the emergence of new pathogens due to increased capability to acquire iron from their surroundings. Extra care should therefore be taken, when comparing plasmid-borne and chromosomal-encoded siderophore gene clusters since their evolutionary histories can be complicated.

In contrast to the wide, but sporadic distribution described above, bisucaberin is narrowly distributed into one lineage, i.e., in three species from the *Fischeri* clade. This finding suggests that bisucaberin was introduced into *Vibrionaceae* through horizontal gene transfer into the most recent common ancestor of *Allivibrio*. Similarly, amphi-enterobactin is restricted to the *Harveyi* clade, vulnibactin is restricted to *V. vulnificus*, and vibriobactin is only found in the closely related species *Vibrio albensis* and *V. cholerae*. Interestingly, no siderophore biosynthesis clusters were identified in the *Haliotocoli* clade.

In addition to showing presence/absence of siderophore biosynthetic gene clusters, Fig 2 also displays how the respective siderophore receptors are distributed in *Vibrionaceae*. Some main findings are that (i) the presence of biosynthetic genes for individual siderophores is accompanied by the presence of the corresponding receptor, (ii) the number of different types of receptors typically exceeds (and in some cases by far) the number of biosynthetic cluster types, and (iii) similar to the biosynthetic clusters the receptors are widely distributed in

*Vibrionaceae*. E.g., *iutA* (aerobactin receptor gene) and *desA* (deferroxamine B receptor gene) are found in nearly all clades. Also, the receptor genes *viuA* (for vibriobactin), *vuuA* (for vulniobactin), *pvuA* (for vibrioferrin), *vctA*, *irgA* and *peuA* (all three for enterobactin), and finally *fhuA* (for ferrichrome) are widely distributed. In contrast, other receptors are more narrowly distributed, e.g., the bisucaberin receptor gene *bitA*, which is restricted to the *Fischeri* clade, more specifically to the same three *Aliivibrio* species that contain corresponding bisucaberin biosynthesis clusters.

Interestingly, (iv) known pathogens are conspicuously rich in siderophore receptors. E.g., *V. cholerae*, *V. alginolyticus* and *V. parahaemolyticus* encode seven, eight and five different receptor types, respectively. It is tempting to speculate that this richness likely reflects the life-style of these bacteria, where iron acquisition would be critical, especially during the initial phases of infections. Also, having multiple siderophore receptors would make them efficient “cheaters”, i.e., they can use siderophores produced by other species rather than from themselves. The receptors IrgA, VctA, FhuA, PeuA and DesA are found in many “cheaters” throughout *Vibrionaceae*. Another explanation for the apparent richness in receptor types is that these species have been characterized in more detail than environmental isolates, but at least multiple known pathogens still encode a higher number of known siderophore receptor types. It should however be noted that there are also examples of the opposite, i.e., very important pathogens that are poor in siderophore systems. E.g., the genome of *P. damsela* subsp. *piscicida* strain DI21 encodes only one known siderophore system (piscibactin) (see Fig 2; [68]). Regardless, the bacterium is known as the causative agent of photobacteriosis, a disease that causes high mortality rates in outbreaks in fish farms worldwide (see [69]). According to a tBLASTn search from this study, the *P. damsela* subsp. *piscicida* strain OT-51443 genome [70] does not contain homologs of the piscibactin gene cluster found in strain DI21, or any other known siderophore cluster (known from *Vibrionaceae*). The sister subspecies, *P. damsela* subsp. *damsela*, also causes disease in a broader range of marine animals, and contains no known siderophore systems. It is possible that the apparent lack of siderophore-based iron uptake systems is compensated for by other systems, e.g., heme and/or hemoglobin uptake systems.

## Evolution of siderophore systems

To evaluate the evolutionary history of siderophore systems (biosynthesis and receptors) in *Vibrionaceae*, and to better understand their present-day distribution, we concatenated the protein sequences from the most abundant types of biosynthetic clusters separately, and aligned the resulting sequences using ClustalW. Only species included in Fig 2 were investigated. Maximum likelihood (ML) trees were generated from PvsABCDE (vibrioferrin), Irp123459 (piscibactin) and IucABCD (aerobactin) datasets. Similarly, datasets and ML-tree were constructed for siderophore receptors. The rationale for treating receptor sequences separate from biosynthesis genes was that receptor genes are often located elsewhere in the genome, and are much more widely distributed than the biosynthesis genes. ML-trees of the concatenated biosynthesis proteins and receptors were juxtaposed a host phylogeny based on same dataset as that used in Fig 2. Similar tree topologies (congruence) were interpreted as same evolutionary trajectories (i.e., vertical evolution), whereas conflicting topologies would suggest horizontal gene transfer events.

Fig 3 shows the genic organization and phylogeny of the piscibactin system. Nodes in the trees are highly supported by 95–100% bootstrap values. Although there are some discrepancies in the phylogenies, the overall tree topologies are very similar. Based on the criteria described above the data thus suggest that the piscibactin biosynthesis pathway was introduced

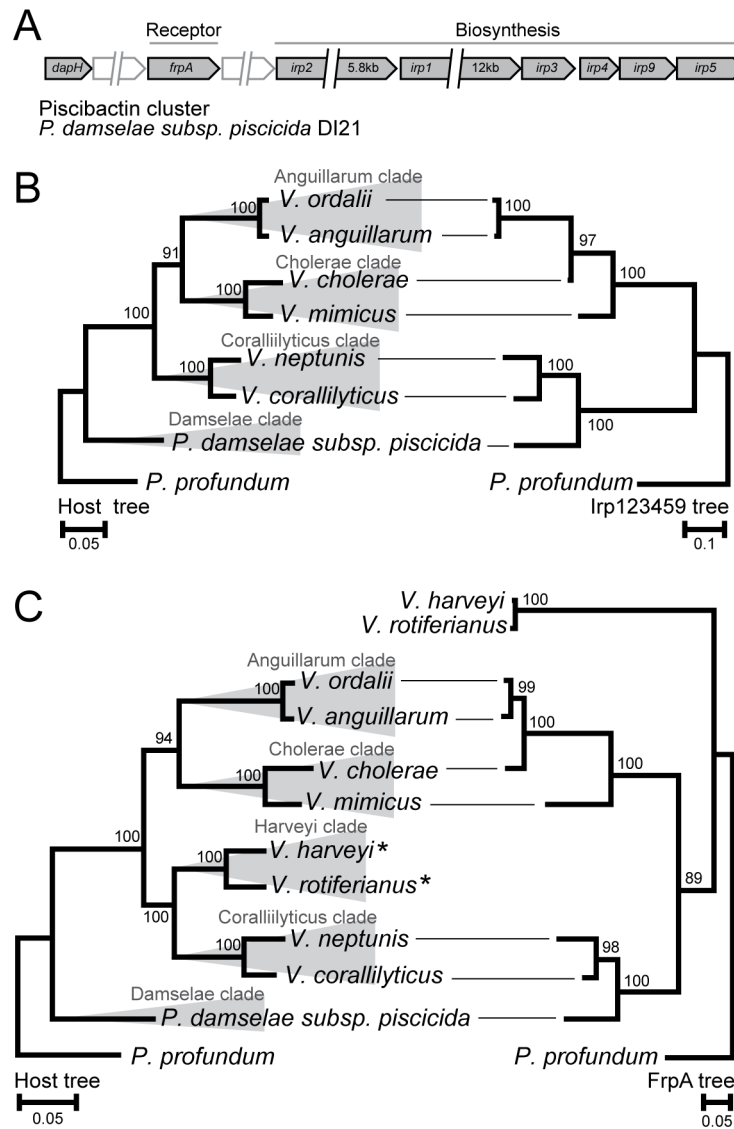

**Fig 3. Phylogeny of the piscibactin biosynthesis cluster and receptor within the *Vibrionaceae* family.** (A) The cluster organization of the biosynthesis cluster and the cognate receptor. (B) Host phylogeny on the left and piscibactin biosynthesis system (Irp123459) phylogeny on the right. (C) Host phylogeny on the left and piscibactin receptor (FrpA) phylogeny on the right. Asterisks denote species that do not encode the piscibactin biosynthesis system, i.e., the FrpA homolog is an exogenous siderophore receptor. Evolutionary analyses were conducted in MEGA6 [58]. The host trees were generated using the ML method and the TM model [59]. The siderophore biosynthesis cluster and receptor trees were generated using the ML method and the JTT model [87]. Bootstrap values are shown at the nodes (JTT model, 2000 replicates) [88]. Branch lengths are measured substitutions per site.

<https://doi.org/10.1371/journal.pone.0191860.g003>

early into *Vibrionaceae* and then stably inherited in a few lineages, and lost from the majority of lineages. Similarly, the overall topology for the proposed piscibactin receptor FrpA and the corresponding host tree are in good overall agreement, except for one clear case of misplacement, i.e., *V. harveyi* and *Vibrio rotiferianus* (Harveyi clade). Interestingly, these two species only contain the receptor, and not the biosynthesis system. This strongly suggests one horizontal gene transfer event of the FrpA receptor into the common ancestor of these two closely related species.

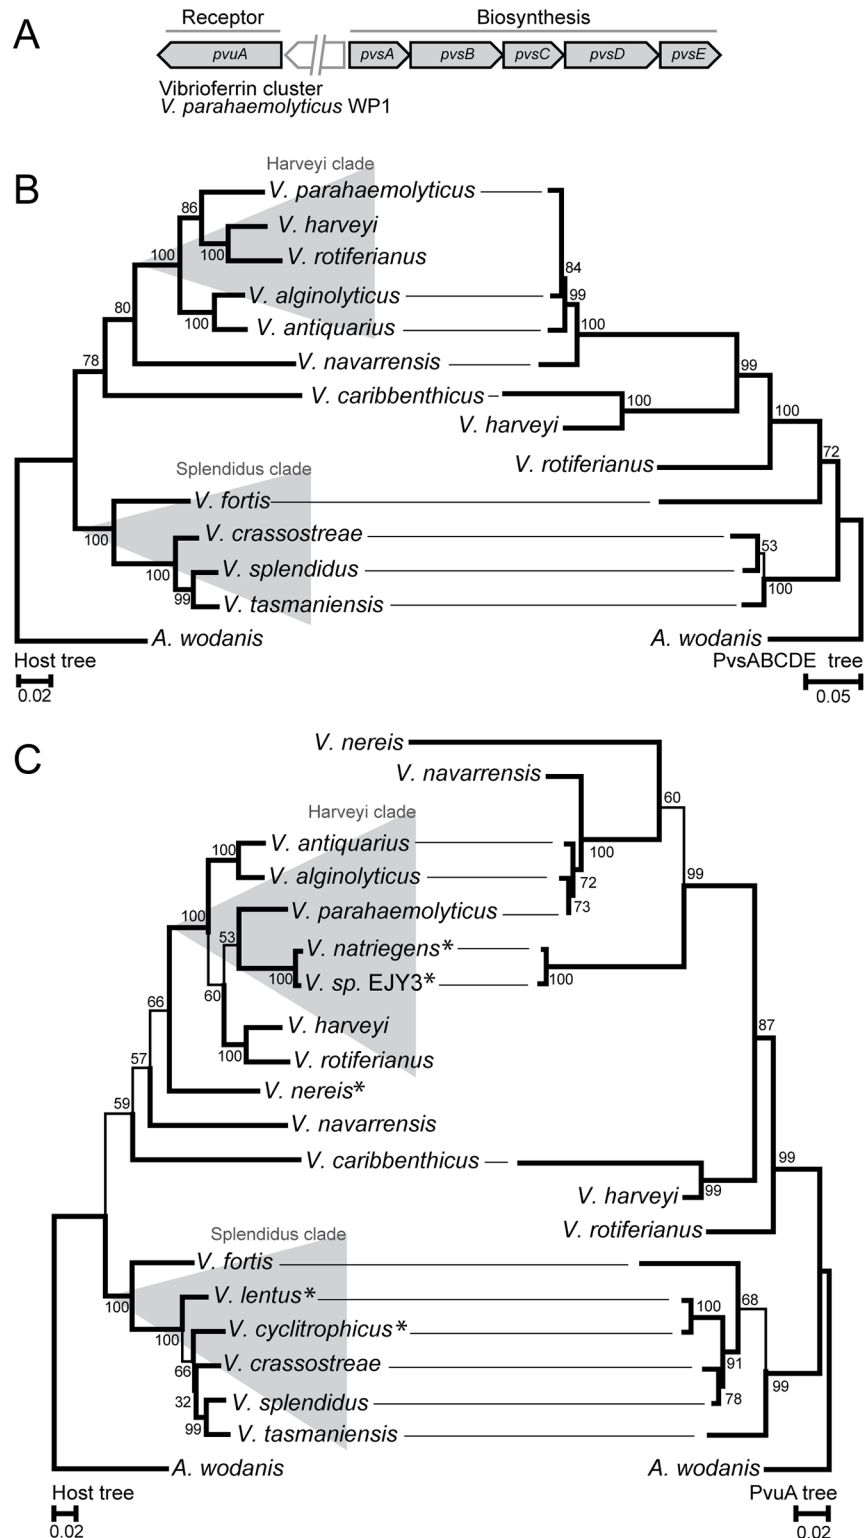

**Fig 4. Phylogeny of the vibrioferrin biosynthesis cluster and receptor within the *Vibrionaceae* family.** (A) The cluster organization of the biosynthesis cluster and the cognate receptor. (B) Host phylogeny on the left and vibrioferrin biosynthesis system (PvsABCDE) phylogeny on the right. (C) Host phylogeny on the left and vibrioferrin receptor (PvuA) phylogeny on the right. Asterisks denote species that do not encode the vibrioferrin biosynthesis system, i.e., the PvuA homolog is an exogenous siderophore receptor. Evolutionary analyses were conducted in

MEGA6 [58]. The host trees were generated using the ML method and the TM model [59]. The siderophore biosynthesis cluster and receptor trees were generated using the ML method and the JTT model [87]. Bootstrap values are shown at the nodes (JTT model, 2000 replicates) [88]. Branch lengths are measured substitutions per site.

<https://doi.org/10.1371/journal.pone.0191860.g004>

Fig 4 shows the genic organization and phylogeny of the vibrioferrin system. Intriguingly, the result is strikingly similar to that of the piscibactin system. The overall tree topologies for the biosynthesis system and the host phylogenies are very similar, except that *V. harveyi* and *V. rotiferianus* are clearly misplaced (strongly supported by high bootstrap values). The evolution of the associated receptor (PvuA) appears to be more influenced by horizontal gene transfer events. The PvuA and host trees are mostly congruent within the *Splendidus* clade, whereas the remaining branches have multiple clear, highly supported, misplacements in the PvuA tree (compared to the host tree). Therefore, the evolution of the biosynthesis and receptor genes is, in part, different with partly vertical and horizontal gene transfers.

Fig 5 shows the genic organization and phylogeny of the aerobactin system. Nodes in the host and IucABCD trees are in general strongly supported by high bootstrap values (Fig 5B). In line with result from piscibactin and vibrioferrin phylogenies, comparison of the host and aerobactin tree topologies show both congruencies and conflicts, which suggests a mix of stable vertical inheritance, and cases of horizontal gene transfers. The evolution of its receptor (IutA) is however, much more complicated (Fig 5C). First, many nodes in the IutA tree are poorly supported. For clarity, the presented IutA tree is therefore a cladogram in which all nodes with less than 60% bootstrap support have been collapsed (60% majority-rule). Regardless, the host-IutA tree comparison reveal a high proportion of well supported conflicts, some of which are highlighted in the figure. Peculiarly, even representatives of closely related representatives from the *Harveyi* clade are found scattered at three different locations in the IutA tree, which suggest rampant spread of IutA within *Vibrionaceae*. Alternatively, the seemingly disordered IutA tree is a result of some artefact in our analysis. The IutA sequences were retrieved from protein databases using a conservative threshold setting (i.e., 50% identity/ 80% coverage), which suggest that the sequences are indeed homologs. Errors could potentially come from wrong naming of species in the databases, but even some errors in naming cannot explain the huge number of “misplacements” in the IutA tree. We therefore conclude that the IutA receptor has a complicated evolutionary history in *Vibrionaceae*, and has likely been introduced into the family several times, and/or been subjected to multiple horizontal gene transfers between *Vibrionaceae* representatives.

The narrow distribution of the bisucaberin cluster (in the *Fischeri* clade) suggests a different evolutionary history, i.e., a recent insertion event into a common ancestor of *A. salmonicida*, *A. wodanis* and *Aliivibrio logei*. Until recently, the bisucaberin biosynthesis genes (*bibABC*) were found exclusively in *A. salmonicida* (within *Vibrionaceae*) [48,89]. Here, the system is located on a genomic location (island) flanked by transposable elements. Our current BLASTp searches show that similar clusters are also found in *A. logei* and *A. wodanis*, together with the corresponding receptor gene *bitA*. So, where does this system originate from? We have in vain tried to identify the donor organism by running BLASTp and PSI-BLAST searches. The best database hits point to *Shewanella* as a possible source (BibA and BibB has 57% and 60% identity over 98% and 97% coverage, respectively, to *S. algae*. BibC 60% identity over 74% coverage to *Shewanella baltica* and *Shewanella putrefaciens*), but this needs to be addressed again as more genomic data from environmental marine bacterial strains are added to the databases.

In summary, the present-day distribution of siderophore systems in *Vibrionaceae* appears to be, perhaps as can be expected, a result of a combination of events: both old and new gene acquisitions, extensive gene loss, and both vertical and horizontal gene transfers.

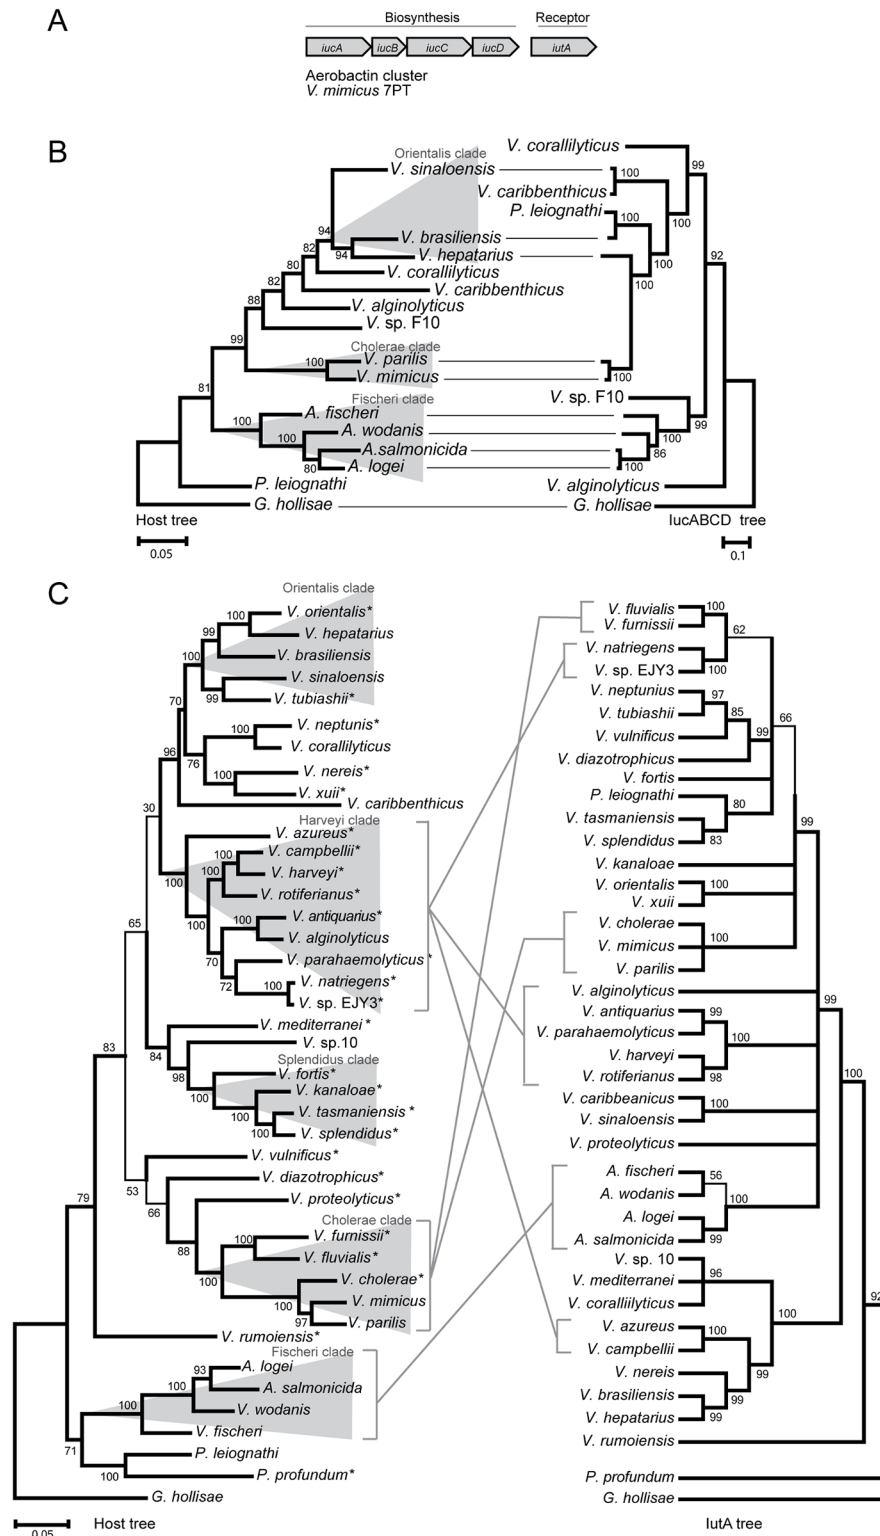

**Fig 5. Phylogeny of the aerobactin biosynthesis cluster and receptor within the *Vibrionaceae* family.** (A) The cluster organization of the biosynthesis cluster and the cognate receptor. (B) Host phylogeny on the left and aerobactin receptor (lucABCD) phylogeny on the right. (C) Host phylogeny on the left and aerobactin receptor (lutA) phylogeny on the right. Asterisks denote species that do not encode the aerobactin biosynthesis system, i.e., the *lutA* homolog is an exogenous siderophore receptor. Evolutionary analyses were conducted in MEGA6 [58]. The host trees were

generated using the ML method and the TM model [59]. The siderophore biosynthesis cluster and receptor trees were generated using the ML method and the JTT model [87]. Bootstrap values are shown at the nodes (JTT model, 2000 replicates) [88]. Branch lengths are measured substitutions per site.

<https://doi.org/10.1371/journal.pone.0191860.g005>

## Supporting information

**S1 Table. Complete lists of homology hits from BLASTp query of nine *Vibrionaceae* siderophore biosynthesis clusters.** Accession numbers and coverage/ identity/ e-value scores are included.

(XLSX)

**S2 Table. Complete lists of homology hits from BLASTp query of thirteen *Vibrionaceae* siderophore receptor.** Accession numbers and coverage/ identity/ e-value scores are included.

(XLSX)

**S1 Fig. The 2D structure information for siderophores from *Vibrionaceae* without a known biosynthesis cluster.** Structures of fluvibactin, nigribactin, trivanchrobactin, ochrobactins A-C and desferrioxamin G.

(PDF)

**S1 Dataset. Fasta file with MLSA dataset (used for construction of host tree in Fig 3B).**

(FAS)

**S2 Dataset. Fasta file with aligned and concatenated piscibactin biosynthesis clusters dataset (used for construction of Irp123459 tree in Fig 3B).**

(FAS)

**S3 Dataset. Fasta file with MLSA dataset (used for construction of host tree in Fig 3C).**

(FAS)

**S4 Dataset. Fasta file with aligned dataset of piscibactin receptor (used for construction of FrpA tree in Fig 3C).**

(FAS)

**S5 Dataset. Fasta file with MLSA dataset (used for construction of host tree in Fig 4B).**

(FAS)

**S6 Dataset. Fasta file with aligned and concatenated vibrioferrin biosynthesis clusters dataset (used for construction of PvsABCDE tree in Fig 4B).**

(FAS)

**S7 Dataset. Fasta file with MLSA dataset (used for construction of host tree in Fig 4C).**

(FAS)

**S8 Dataset. Fasta file with aligned dataset of vibrioferrin receptor (used for construction of FrpA tree in Fig 4C).**

(FAS)

**S9 Dataset. Fasta file with MLSA dataset (used for construction of host tree in Fig 5B).**

(FAS)

**S10 Dataset. Fasta file with aligned and concatenated aerobactin biosynthesis clusters dataset (used for construction of IucABCD tree in Fig 5B).**

(FAS)

**S11 Dataset. Fasta file with MLSA dataset (used for construction of host tree in Fig 5C).**  
(FAS)

**S12 Dataset. Fasta file with aligned dataset of aerobactin receptor (used for construction of FrpA tree in Fig 5C).**  
(FAS)

## Acknowledgments

We thank Professor Tomoo Sawabe, Hokkaido University, for providing multiple sequence alignments.

## Author Contributions

**Conceptualization:** Sunniva Katharina Thode, Rafi Ahmad, Peik Haugen.

**Data curation:** Sunniva Katharina Thode, Ewelina Rojek, Mikolaj Kozlowski, Rafi Ahmad.

**Formal analysis:** Sunniva Katharina Thode.

**Funding acquisition:** Rafi Ahmad, Peik Haugen.

**Investigation:** Sunniva Katharina Thode, Ewelina Rojek, Mikolaj Kozlowski, Peik Haugen.

**Project administration:** Sunniva Katharina Thode, Rafi Ahmad, Peik Haugen.

**Software:** Rafi Ahmad.

**Supervision:** Rafi Ahmad, Peik Haugen.

**Validation:** Sunniva Katharina Thode.

**Visualization:** Sunniva Katharina Thode, Peik Haugen.

**Writing – original draft:** Sunniva Katharina Thode.

**Writing – review & editing:** Sunniva Katharina Thode, Ewelina Rojek, Peik Haugen.

## References

1. Neilands JB (1995) Siderophores: structure and function of microbial iron transport compounds. *J Biol Chem* 270: 26723–26726. PMID: [7592901](https://pubmed.ncbi.nlm.nih.gov/7592901/)
2. Fillat MF (2014) The FUR (ferric uptake regulator) superfamily: Diversity and versatility of key transcriptional regulators. *Archives of Biochemistry and Biophysics* 546: 41–52. <https://doi.org/10.1016/j.abb.2014.01.029> PMID: [24513162](https://pubmed.ncbi.nlm.nih.gov/24513162/)
3. Miethke M (2013) Molecular strategies of microbial iron assimilation: from high-affinity complexes to cofactor assembly systems. *Metallomics* 5: 15–28. <https://doi.org/10.1039/c2mt20193c> PMID: [23192658](https://pubmed.ncbi.nlm.nih.gov/23192658/)
4. Hibbing ME, Fuqua C, Parsek MR, Peterson SB (2010) Bacterial competition: surviving and thriving in the microbial jungle. *Nature reviews Microbiology* 8: 15–25. <https://doi.org/10.1038/nrmicro2259> PMID: [19946288](https://pubmed.ncbi.nlm.nih.gov/19946288/)
5. Bottcher T, Clardy J (2014) A chimeric siderophore halts swarming *Vibrio*. *Angew Chem Int Ed Engl* 53: 3510–3513. <https://doi.org/10.1002/anie.201310729> PMID: [24615751](https://pubmed.ncbi.nlm.nih.gov/24615751/)
6. Holmstrom K, Gram L (2003) Elucidation of the *Vibrio anguillarum* genetic response to the potential fish probiont *Pseudomonas fluorescens* AH2, using RNA-arbitrarily primed PCR. *J Bacteriol* 185: 831–842. <https://doi.org/10.1128/JB.185.3.831-842.2003> PMID: [12533458](https://pubmed.ncbi.nlm.nih.gov/12533458/)
7. Payne SM, Mey AR, Wyckoff EE (2016) *Vibrio* Iron Transport: Evolutionary Adaptation to Life in Multiple Environments. *Microbiol Mol Biol Rev* 80: 69–90. <https://doi.org/10.1128/MMBR.00046-15> PMID: [26658001](https://pubmed.ncbi.nlm.nih.gov/26658001/)



8. Sawabe T, Ogura Y, Matsumura Y, Feng G, Amin AR, Mino S, et al. (2013) Updating the *Vibrio* clades defined by multilocus sequence phylogeny: proposal of eight new clades, and the description of *Vibrio tritonius* sp. nov. *Front Microbiol* 4: 414. <https://doi.org/10.3389/fmicb.2013.00414> PMID: 24409173
9. Wyckoff EE, Smith SL, Payne SM (2001) *VibD* and *VibH* are required for late steps in vibriobactin biosynthesis in *Vibrio cholerae*. *J Bacteriol* 183: 1830–1834. <https://doi.org/10.1128/JB.183.5.1830-1834.2001> PMID: 11160122
10. Butterson JR, Choi MH, Watnick PI, Carroll PA, Calderwood SB (2000) *Vibrio cholerae* *VibF* is required for vibriobactin synthesis and is a member of the family of nonribosomal peptide synthetases. *J Bacteriol* 182: 1731–1738. PMID: 10692380
11. Stoebner JA, Butterson JR, Calderwood SB, Payne SM (1992) Identification of the vibriobactin receptor of *Vibrio cholerae*. *J Bacteriol* 174: 3270–3274. PMID: 1315733
12. Wyckoff EE, Allred BE, Raymond KN, Payne SM (2015) Catechol Siderophore Transport by *Vibrio cholerae*. *J Bacteriol* 197: 2840–2849. <https://doi.org/10.1128/JB.00417-15> PMID: 26100039
13. Mey AR, Wyckoff EE, Oglesby AG, Rab E, Taylor RK, Payne SM (2002) Identification of the *Vibrio cholerae* enterobactin receptors *VctA* and *IrgA*: *IrgA* is not required for virulence. *Infect Immun* 70: 3419–3426. <https://doi.org/10.1128/IAI.70.7.3419-3426.2002> PMID: 12065481
14. Rogers MB, Sexton JA, DeCastro GJ, Calderwood SB (2000) Identification of an operon required for ferrichrome iron utilization in *Vibrio cholerae*. *J Bacteriol* 182: 2350–2353. PMID: 10735886
15. Linkous DA, Oliver JD (1999) Pathogenesis of *Vibrio vulnificus*. *FEMS Microbiol Lett* 174: 207–214. PMID: 10339810
16. Tan W, Verma V, Jeong K, Kim SY, Jung CH, Lee SE, et al. (2014) Molecular characterization of vulnibactin biosynthesis in *Vibrio vulnificus* indicates the existence of an alternative siderophore. *Front Microbiol* 5: 1. <https://doi.org/10.3389/fmicb.2014.00001> PMID: 24478763
17. Webster AC, Litwin CM (2000) Cloning and characterization of *vuuA*, a gene encoding the *Vibrio vulnificus* ferric vulnibactin receptor. *Infect Immun* 68: 526–534. PMID: 10639413
18. Simpson LM, Oliver JD (1983) Siderophore production by *Vibrio vulnificus*. *Infect Immun* 41: 644–649. PMID: 6223882
19. Tanabe T, Naka A, Aso H, Nakao H, Narimatsu S, Inoue Y, et al. (2005) A novel aerobactin utilization cluster in *Vibrio vulnificus* with a gene involved in the transcription regulation of the *iutA* homologue. *Microbiol Immunol* 49: 823–834. PMID: 16172537
20. Aso H, Miyoshi S, Nakao H, Okamoto K, Yamamoto S (2002) Induction of an outer membrane protein of 78 kDa in *Vibrio vulnificus* cultured in the presence of desferrioxamine B under iron-limiting conditions. *FEMS Microbiol Lett* 212: 65–70. PMID: 12076789
21. Tanabe T, Takata N, Naka A, Moon YH, Nakao H, Inoue Y, et al. (2005) Identification of an *AraC*-like regulator gene required for induction of the 78-kDa ferrioxamine B receptor in *Vibrio vulnificus*. *FEMS Microbiol Lett* 249: 309–314. <https://doi.org/10.1016/j.femsle.2005.06.025> PMID: 16000245
22. Andrus CR, Walter M, Crosa JH, Payne SM (1983) Synthesis of siderophores by pathogenic *Vibrio* species. *Current Microbiology* 9: 209–214.
23. Daniels NA, MacKinnon L, Bishop R, Altekruze S, Ray B, Hammond RM, et al. (2000) *Vibrio parahaemolyticus* infections in the United States, 1973–1998. *J Infect Dis* 181: 1661–1666. <https://doi.org/10.1086/315459> PMID: 10823766
24. Tanabe T, Funahashi T, Nakao H, Miyoshi S, Shinoda S, Yamamoto S (2003) Identification and characterization of genes required for biosynthesis and transport of the siderophore vibrioferrin in *Vibrio parahaemolyticus*. *J Bacteriol* 185: 6938–6949. <https://doi.org/10.1128/JB.185.23.6938-6949.2003> PMID: 14617658
25. Funahashi T, Moriya K, Uemura S, Miyoshi S, Shinoda S, Narimatsu S, et al. (2002) Identification and characterization of *pvuA*, a gene encoding the ferric vibrioferrin receptor protein in *Vibrio parahaemolyticus*. *J Bacteriol* 184: 936–946. <https://doi.org/10.1128/jb.184.4.936-946.2002> PMID: 11807053
26. Tanabe T, Funahashi T, Shiuchi K, Okajima N, Nakao H, Miyamoto K, et al. (2012) Characterization of *Vibrio parahaemolyticus* genes encoding the systems for utilization of enterobactin as a xenosiderophore. *Microbiology* 158: 2039–2049. <https://doi.org/10.1099/mic.0.059568-0> PMID: 22700651
27. Tanabe T, Kato A, Shiuchi K, Miyamoto K, Tsujibo H, Maki J, et al. (2014) Regulation of the expression of the *Vibrio parahaemolyticus* *peuA* gene encoding an alternative ferric enterobactin receptor. *PLoS One* 9: e105749. <https://doi.org/10.1371/journal.pone.0105749> PMID: 25148374
28. Funahashi T, Tanabe T, Aso H, Nakao H, Fujii Y, Okamoto K, et al. (2003) An iron-regulated gene required for utilization of aerobactin as an exogenous siderophore in *Vibrio parahaemolyticus*. *Microbiology* 149: 1217–1225. <https://doi.org/10.1099/mic.0.26066-0> PMID: 12724383
29. Funahashi T, Tanabe T, Shiuchi K, Nakao H, Yamamoto S (2009) Identification and characterization of genes required for utilization of desferri-ferrichrome and aerobactin in *Vibrio parahaemolyticus*. *Biol Pharm Bull* 32: 359–365. PMID: 19252278

30. Mustapha S, Mustapha EM, Nozha C (2013) *Vibrio alginolyticus*: an emerging pathogen of food borne diseases. *Int J Sci Tech* 2: 302–309.
31. Wang Q, Liu Q, Ma Y, Zhou L, Zhang Y (2007) Isolation, sequencing and characterization of cluster genes involved in the biosynthesis and utilization of the siderophore of marine fish pathogen *Vibrio alginolyticus*. *Arch Microbiol* 188: 433–439. <https://doi.org/10.1007/s00203-007-0261-6> PMID: 17593352
32. Andrus C, Walter M, Crosa J, Payne S (1983) Synthesis of siderophores by pathogenic *Vibrio* species. *Curr Microbiol* 9: 209–214.
33. Wang Q, Liu Q, Cao X, Yang M, Zhang Y (2008) Characterization of two TonB systems in marine fish pathogen *Vibrio alginolyticus*: their roles in iron utilization and virulence. *Arch Microbiol* 190: 595–603. <https://doi.org/10.1007/s00203-008-0407-1> PMID: 18629473
34. Frans I, Michiels CW, Bossier P, Willems KA, Lievens B, Rediers H (2011) *Vibrio anguillarum* as a fish pathogen: virulence factors, diagnosis and prevention. *J Fish Dis* 34: 643–661. <https://doi.org/10.1111/j.1365-2761.2011.01279.x> PMID: 21838709
35. Enger O, Husevag B, Goksoyr J (1991) Seasonal variations in presence of *Vibrio salmonicida* and total bacterial counts in Norwegian fish-farm water. *Can J Microbiol* 37: 618–623. PMID: 1954575
36. Colquhoun D, Sorum H (2001) Temperature dependent siderophore production in *Vibrio salmonicida*. *Microb Pathog* 31: 213–219. <https://doi.org/10.1006/mpat.2001.0464> PMID: 11710841
37. Osorio CR, Juiz-Rio S, Lemos ML (2006) A siderophore biosynthesis gene cluster from the fish pathogen *Photobacterium damsela* subsp. *piscicida* is structurally and functionally related to the *Yersinia* high-pathogenicity island. *Microbiology* 152: 3327–3341. <https://doi.org/10.1099/mic.0.29190-0> PMID: 17074903
38. Souto A, Montaños MA, Rivas AJ, Balado M, Osorio CR, Rodríguez J, et al. (2012) Structure and Biosynthetic Assembly of Piscibactin, a Siderophore from *Photobacterium damsela* subsp. *piscicida*, Predicted from Genome Analysis. *European Journal of Organic Chemistry* 2012: 5693–5700.
39. Actis LA, Fish W, Crosa JH, Kellerman K, Ellenberger SR, Hauser FM, et al. (1986) Characterization of anguibactin, a novel siderophore from *Vibrio anguillarum* 775(pJM1). *J Bacteriol* 167: 57–65. PMID: 3013839
40. Alice AF, Lopez CS, Crosa JH (2005) Plasmid- and chromosome-encoded redundant and specific functions are involved in biosynthesis of the siderophore anguibactin in *Vibrio anguillarum* 775: a case of chance and necessity? *J Bacteriol* 187: 2209–2214. <https://doi.org/10.1128/JB.187.6.2209-2214.2005> PMID: 15743971
41. Balado M, Osorio CR, Lemos ML (2006) A gene cluster involved in the biosynthesis of vanchrobactin, a chromosome-encoded siderophore produced by *Vibrio anguillarum*. *Microbiology* 152: 3517–3528. <https://doi.org/10.1099/mic.0.29298-0> PMID: 17159203
42. Balado M, Osorio CR, Lemos ML (2009) FvtA is the receptor for the siderophore vanchrobactin in *Vibrio anguillarum*: utility as a route of entry for vanchrobactin analogues. *Appl Environ Microbiol* 75: 2775–2783. <https://doi.org/10.1128/AEM.02897-08> PMID: 19270115
43. Naka H, Lopez CS, Crosa JH (2008) Reactivation of the vanchrobactin siderophore system of *Vibrio anguillarum* by removal of a chromosomal insertion sequence originated in plasmid pJM1 encoding the anguibactin siderophore system. *Environ Microbiol* 10: 265–277. <https://doi.org/10.1111/j.1462-2920.2007.01450.x> PMID: 18005167
44. Naka H, Crosa JH (2012) Identification and characterization of a novel outer membrane protein receptor FetA for ferric enterobactin transport in *Vibrio anguillarum* 775 (pJM1). *Biometals* 25: 125–133. <https://doi.org/10.1007/s10534-011-9488-4> PMID: 21842211
45. Lemos M, Osorio C (2010) Iron Uptake in *Vibrio* and *Aeromonas*. In: Cornelis P, Andrews SC, editors. *Iron Uptake and Homeostasis in Microorganisms*. Norfolk, UK: Caister Academic Press. pp. 117–141.
46. Winkelmann G, Schmid D, Nicholson G, Jung G, Colquhoun D (2002) Bisucaberin—a dihydroxamate siderophore isolated from *Vibrio salmonicida*, an important pathogen of farmed Atlantic salmon (*Salmo salar*). *BioMetals* 15: 153–160. PMID: 12046923
47. Kadi N, Song L, Challis G (2008) Bisucaberin biosynthesis: an adenylating domain of the BibC multi-enzyme catalyzes cyclodimerization of N-hydroxy-N-succinylcadaverine. *Chem Commun (Camb)* 41: 5119–5121.
48. Thode SK, Kahlke T, Robertsen EM, Hansen H, Haugen P (2015) The immediate global responses of *Aliivibrio salmonicida* to iron limitations. *BMC Microbiol* 15: 1–9.
49. Hjerde E, Lorentzen M, Holden M, Seeger K, Paulsen S, Bason N (2008) The genome sequence of the fish pathogen *Aliivibrio salmonicida* strain LFI1238 shows extensive evidence of gene decay. *BMC Genomics* 9: 616. <https://doi.org/10.1186/1471-2164-9-616> PMID: 19099551
50. Osorio CR, Rivas AJ, Balado M, Fuentes-Monteverde JC, Rodríguez J, Jiménez C, et al. (2015) A Transmissible Plasmid-Borne Pathogenicity Island Confers Piscibactin Biosynthesis in the Fish

- Pathogen *Photobacterium damsela* subsp. *piscicida*. *Appl Environ Microbiol* 81: 5867–5879. <https://doi.org/10.1128/AEM.01580-15> PMID: 26092457
51. Zane HK, Naka H, Rosconi F, Sandy M, Haygood MG, Butler A (2014) Biosynthesis of amphi-enterobactin siderophores by *Vibrio harveyi* BAA-1116: identification of a bifunctional nonribosomal peptide synthetase condensation domain. *J Am Chem Soc* 136: 5615–5618. <https://doi.org/10.1021/ja5019942> PMID: 24701966
  52. Reitz ZL, Sandy M, Butler A (2017) Biosynthetic considerations of triscatechol siderophores framed on serine and threonine macrolactone scaffolds. *Metallomics* 9: 824–839. <https://doi.org/10.1039/c7mt00111h> PMID: 28594012
  53. Moon YH, Tanabe T, Funahashi T, Shiuchi K, Nakao H, Yamamoto S (2004) Identification and characterization of two contiguous operons required for aerobactin transport and biosynthesis in *Vibrio mimicus*. *Microbiol Immunol* 48: 389–398. PMID: 15215626
  54. Di Lorenzo M, Stork M, Tolmasky ME, Actis LA, Farrell D, Welch TJ, et al. (2003) Complete sequence of virulence plasmid pJM1 from the marine fish pathogen *Vibrio anguillarum* strain 775. *J Bacteriol* 185: 5822–5830. <https://doi.org/10.1128/JB.185.19.5822-5830.2003> PMID: 13129954
  55. Tanabe T, Funahashi T, Miyamoto K, Tsujibo H, Yamamoto S (2011) Identification of genes, *desR* and *desA*, required for utilization of desferrioxamine B as a xenosiderophore in *Vibrio furnissii*. *Biol Pharm Bull* 34: 570–574. PMID: 21467648
  56. Huson DH, Bryant D (2006) Application of phylogenetic networks in evolutionary studies. *Mol Biol Evol* 23: 254–267. <https://doi.org/10.1093/molbev/msj030> PMID: 16221896
  57. Larkin MA, Blackshields G, Brown NP, Chenna R, McGettigan PA, McWilliam H, et al. (2007) Clustal W and Clustal X version 2.0. *Bioinformatics* 23: 2947–2948. <https://doi.org/10.1093/bioinformatics/btm404> PMID: 17846036
  58. Tamura K, Stecher G, Peterson D, Filipski A, Kumar S (2013) MEGA6: Molecular Evolutionary Genetics Analysis version 6.0. *Mol Biol Evol* 30: 2725–2729. <https://doi.org/10.1093/molbev/mst197> PMID: 24132122
  59. Tamura K, Nei M (1993) Estimation of the number of nucleotide substitutions in the control region of mitochondrial DNA in humans and chimpanzees. *Mol Biol Evol* 10: 512–526. <https://doi.org/10.1093/oxfordjournals.molbev.a040023> PMID: 8336541
  60. Yamamoto S, Okujo N, Fujita Y, Saito M, Yoshida T, Shinoda S (1993) Structures of two polyamine-containing catecholate siderophores from *Vibrio fluvialis*. *J Biochem* 113: 538–544. PMID: 8340347
  61. Nielsen A, Mansson M, Wietz M, Varming AN, Phipps RK, Larsen TO, et al. (2012) Nigribactin, a novel siderophore from *Vibrio nigripulchritudo*, modulates *Staphylococcus aureus* virulence gene expression. *Mar Drugs* 10: 2584–2595. <https://doi.org/10.3390/md10112584> PMID: 23203279
  62. Sandy M, Han A, Blunt J, Munro M, Haygood M, Butler A (2010) Vanchrobactin and anguibactin siderophores produced by *Vibrio* sp. DS40M4. *J Nat Prod* 73: 1038–1043. <https://doi.org/10.1021/np900750g> PMID: 20521785
  63. Martin JD, Ito Y, Homann VV, Haygood MG, Butler A (2006) Structure and membrane affinity of new amphiphilic siderophores produced by *Ochrobactrum* sp. SP18. *J Biol Inorg Chem* 11: 633–641. <https://doi.org/10.1007/s00775-006-0112-y> PMID: 16791646
  64. Martinez JS, Haygood MG, Butler A (2001) Identification of a natural desferrioxamine siderophore produced by a marine bacterium. *Limnology and Oceanography* 46: 420–424.
  65. Crosa JH, Walsh CT (2002) Genetics and Assembly Line Enzymology of Siderophore Biosynthesis in Bacteria. *Microbiology and Molecular Biology Reviews* 66: 223–249. <https://doi.org/10.1128/MMBR.66.2.223-249.2002> PMID: 12040125
  66. Naka H, Actis LA, Crosa JH (2013) The anguibactin biosynthesis and transport genes are encoded in the chromosome of *Vibrio harveyi*: a possible evolutionary origin for the pJM1 plasmid-encoded system of *Vibrio anguillarum*? *Microbiologyopen* 2: 182–194. <https://doi.org/10.1002/mbo3.65> PMID: 23335587
  67. Li Y, Ma Q (2017) Iron Acquisition Strategies of *Vibrio anguillarum*. *Front Cell Infect Microbiol* 7: 342. <https://doi.org/10.3389/fcimb.2017.00342> PMID: 28791260
  68. Balado M, Souto A, Vences A, Careaga VP, Valderrama K, Segade Y, et al. (2015) Two Catechol Siderophores, Acinetobactin and Amonabactin, Are Simultaneously Produced by *Aeromonas salmonicida* subsp. *salmonicida* Sharing Part of the Biosynthetic Pathway. *ACS Chem Biol* 10: 2850–2860. <https://doi.org/10.1021/acscchembio.5b00624> PMID: 26463084
  69. Toranzo AE, Magariños B, Romalde JL (2005) A review of the main bacterial fish diseases in mariculture systems. *Aquaculture* 246: 37–61.
  70. Aoki T, Teru Y, Morimoto N, Kono T, Sakai M, Takano T, et al. (2017) Complete Genome Sequence of *Photobacterium damsela* subsp. *piscicida* Strain OT-51443 Isolated from Yellowtail (*Seriola quinqueradiata*) in Japan. *Genome Announc* 5.

71. Giubergia S, Machado H, Valentina Mateiu R, Gram L (2016) *Vibrio galathea* sp. nov., a member of the family Vibrionaceae isolated from a mussel. *Int J Syst Evol Microbiol* 66: 347–352. <https://doi.org/10.1099/ijsem.0.000723> PMID: 26514698
72. Goudenege D, Boursicot V, Versigny T, Bonnetot S, Ratiskol J, Siquin C, et al. (2014) Genome sequence of *Vibrio diabolicus* and identification of the exopolysaccharide HE800 biosynthesis locus. *Appl Microbiol Biotechnol* 98: 10165–10176. <https://doi.org/10.1007/s00253-014-6086-8> PMID: 25273176
73. Cano-Gomez A, Goulden EF, Owens L, Hoj L (2010) *Vibrio owensii* sp. nov., isolated from cultured crustaceans in Australia. *FEMS Microbiol Lett* 302: 175–181. <https://doi.org/10.1111/j.1574-6968.2009.01850.x> PMID: 20002183
74. Yoshizawa S, Tsuruya Y, Fukui Y, Sawabe T, Yokota A, Kogure K, et al. (2012) *Vibrio jasicida* sp. nov., a member of the Harveyi clade, isolated from marine animals (packhorse lobster, abalone and Atlantic salmon). *Int J Syst Evol Microbiol* 62: 1864–1870. <https://doi.org/10.1099/ijms.0.025916-0> PMID: 21984666
75. Balcazar JL, Planas M, Pintado J (2012) *Vibrio inhibens* sp. nov., a novel bacterium with inhibitory activity against *Vibrio* species. *J Antibiot (Tokyo)* 65: 301–305.
76. Urbanczyk Y, Ogura Y, Hayashi T, Urbanczyk H (2015) Description of a novel marine bacterium, *Vibrio hyugaensis* sp. nov., based on genomic and phenotypic characterization. *Syst Appl Microbiol* 38: 300–304. <https://doi.org/10.1016/j.syapm.2015.04.001> PMID: 25952324
77. Yoshizawa S, Wada M, Yokota A, Kogure K (2010) *Vibrio sagamiensis* sp. nov., luminous marine bacteria isolated from sea water. *J Gen Appl Microbiol* 56: 499–507. PMID: 21282906
78. Chimetto LA, Cleenwerck I, Moreira AP, Brocchi M, Willems A, De Vos P, et al. (2011) *Vibrio variabilis* sp. nov. and *Vibrio maritimus* sp. nov., isolated from *Palythoa caribaeorum*. *Int J Syst Evol Microbiol* 61: 3009–3015. <https://doi.org/10.1099/ijms.0.026997-0> PMID: 21296931
79. Kushmaro A, Banin E, Loya Y, Stackebrandt E, Rosenberg E (2001) *Vibrio shiloi* sp. nov., the causative agent of bleaching of the coral *Oculina patagonica*. *International Journal of Systematic and Evolutionary Microbiology* 51: 1383–1388. <https://doi.org/10.1099/00207713-51-4-1383> PMID: 11491336
80. Lasa A, Dieguez AL, Romalde JL (2013) *Vibrio toranzoniae* sp. nov., a new member of the Splendidus clade in the genus *Vibrio*. *Syst Appl Microbiol* 36: 96–100. <https://doi.org/10.1016/j.syapm.2012.11.005> PMID: 23280322
81. Nam YD, Chang HW, Park JR, Kwon HY, Quan ZX, Park YH, et al. (2007) *Vibrio littoralis* sp. nov., isolated from a Yellow Sea tidal flat in Korea. *Int J Syst Evol Microbiol* 57: 562–565. <https://doi.org/10.1099/ijms.0.64653-0> PMID: 17329785
82. Gomez-Gil B, Thompson FL, Thompson CC, Swings J (2003) *Vibrio pacinii* sp. nov., from cultured aquatic organisms. *Int J Syst Evol Microbiol* 53: 1569–1573. <https://doi.org/10.1099/ijms.0.02670-0> PMID: 13130050
83. Kirchberger PC, Turnsek M, Hunt DE, Haley BJ, Colwell RR, Polz MF, et al. (2014) *Vibrio metoecus* sp. nov., a close relative of *Vibrio cholerae* isolated from coastal brackish ponds and clinical specimens. *Int J Syst Evol Microbiol* 64: 3208–3214. <https://doi.org/10.1099/ijms.0.060145-0> PMID: 24972615
84. Kumar NR, Nair S (2007) *Vibrio rhizosphaerae* sp. nov., a red-pigmented bacterium that antagonizes phytopathogenic bacteria. *Int J Syst Evol Microbiol* 57: 2241–2246. <https://doi.org/10.1099/ijms.0.65017-0> PMID: 17911290
85. Rivas R, García-Fraile P, Mateos PF, Martínez-Molina E, Velázquez E (2006) Photobacterium halotolerans sp. nov., isolated from Lake Martel in Spain. *International Journal of Systematic and Evolutionary Microbiology* 56: 1067–1071. <https://doi.org/10.1099/ijms.0.64099-0> PMID: 16627656
86. Gomez-Gil B, Roque A, Rotllant G, Romalde JL, Doce A, Eggermont M, et al. (2016) Photobacterium sanguinancris sp. nov. isolated from marine animals. *Antonie van Leeuwenhoek* 109: 817–825. <https://doi.org/10.1007/s10482-016-0681-x> PMID: 27048242
87. Jones DT, Taylor WR, Thornton JM (1992) The rapid generation of mutation data matrices from protein sequences. *Comput Appl Biosci* 8: 275–282. PMID: 1633570
88. Felsenstein J (1985) Confidence Limits on Phylogenies: An Approach Using the Bootstrap. *Evolution* 39: 783–791. <https://doi.org/10.1111/j.1558-5646.1985.tb00420.x> PMID: 28561359
89. Thode SK, Baekkedal C, Soderberg JJ, Hjerde E, Hansen H, Haugen P (2017) Construction of a fur null mutant and RNA-sequencing provide deeper global understanding of the *Aliivibrio salmonicida* Fur regulon. *PeerJ* 5: e3461. <https://doi.org/10.7717/peerj.3461> PMID: 28717590
